# Supplementary material
Source: publisher figshare collection journal article supplement (https://gsapubs.figshare.com/articles/dataset/_/22763711)
Supplement: Supplementary file 1 [file 1]

## Sheet: Salmon River Suture Zone Rahl
Sample and	Peak center position				Peak width (FWHM)				Peak amplitude				Peak area				Rahl parameters		Tpeak		Long, S.P., Barba, W.K., McKay, M.P., and Soignard, E., 2023, Thermal architecture of the Salmon River suture zone, Idaho, USA: Implications for the structural evolution of a ductile accretionary complex during arc-continent collision: Geosphere, v. 19, https://doi.org/10.1130/GES02621.1.
spot number	D1	D3	G	D2	D1	D3	G	D2	D1	D3	G	D2	D1	D3	G	D2	R1	R2	(°C)
ID20-26_spot11	1349	-	1581.5	1619	52	-	22	18	180	-	780	50	13278	-	23473	957	0.231	0.352	431.541
ID20-26_spot2	1352	-	1582	1620	50	-	22	18	180	-	770	70	11854	-	24031	1340	0.234	0.318	468.669
ID20-26_spot3	1353	-	1581	1620	43	-	22	18	270	-	1020	70	15292	-	31833	1340	0.265	0.324	470.968
ID20-26_spot15	1353	-	1582	1618	48	-	22	22	150	-	720	60	9849	-	22471	1404	0.208	0.292	488.994
ID20-26_spot6	1353	-	1582	1618	38	-	23	18	180	-	650	70	9009	-	18933	1340	0.277	0.308	491.366
ID20-26_spot4	1350	-	1581.5	1620	44	-	22	18	140	-	640	75	8189	-	19974	1436	0.219	0.277	508.151
ID20-26_spot12	1353	-	1581	1617	45	-	21	21	170	-	850	105	9688	-	24416	2345	0.2	0.266	514.432
ID20-26_spot14	1354	-	1582	1620	43	-	22	22	290	-	1380	100	15792	-	43069	2340	0.21	0.258	525.847
ID20-26_spot8	1354	-	1582	1621	40	-	22	20	250	-	1250	120	13171	-	37616	2552	0.2	0.247	534.705
ID20-26_spot9	1354	-	1581	1619	42	-	22	18	290	-	1680	110	16043	-	50556	2106	0.173	0.234	540.724
																mean:	0.2217	0.2876	497.54
																1σ (internal):	0.0296919	0.0357888	32.3296
																1 SE (internal):	0.00938941	0.0113174	10.2235
																		prop. 2 SE (internal and external):	37.6574
																		n:	10
ID20-27_spot9	1351	-	1582	1621	52	-	19	20	340	-	930	180	27772	-	27756	4742	0.366	0.461	352.06
ID20-27_spot14	1353	1550	1583	1622	38	50	22	25	1230	30	1920	540	68677	1595	66350	21206	0.641	0.509	366.761
ID20-27_spot3	1354	-	1582	1621	42	-	20	18	800	-	1800	325	51074	-	52896	9189	0.444	0.451	382.666
ID20-27_spot13	1352	-	1581	1619	39	-	22	26	675	-	1450	230	41351	-	50108	6360	0.466	0.452	387.044
ID20-27_spot16	1354	-	1582	1623	38	-	20	14	980	-	1750	500	55663	-	54978	10996	0.56	0.458	403.03
ID20-27_spot4	1352	-	1583	1622	43	-	23	18	740	-	1280	300	46754	-	46244	8482	0.578	0.461	403.953
ID20-27_spot17	1351	1550	1583	1621	38	50	23	19	880	30	1330	370	52527	1595	48051	9259	0.662	0.478	404.371
ID20-27_spot15	1354	1550	1582	1622	38	50	20	18	1560	30	3090	750	87102	1595	97075	14357	0.505	0.439	410.377
ID20-27_spot8	1353	-	1581	1612	45	-	17	25	440	-	1620	180	29093	-	43260	4786	0.272	0.377	416.36
ID20-27_spot18	1353	-	1581	1621	38	-	21.5	22	960	-	1550	380	49900	-	50656	8891	0.619	0.456	418.488
ID20-27_spot10	1354	-	1582	1619	43	-	22	22	570	-	1450	250	34770	-	48490	5849	0.393	0.39	434.829
ID20-27_spot11	1352	-	1581	1619	43	-	25	22	225	-	620	40	14216	-	22775	936	0.363	0.375	443.036
ID20-27_spot7	1353	-	1581	1620	44	-	20	20	365	-	1440	130	25227	-	45239	2765	0.253	0.344	446.278
ID20-27_spot6	1354	-	1581	1621	41	-	21	22	560	-	1680	280	33736	-	50048	9676	0.333	0.361	450.031
ID20-27_spot12	1354	-	1581	1615	43	-	18	25	370	-	1350	150	20148	-	35705	3988	0.274	0.337	459.594
ID20-27_spot2	1351	-	1581	1622	49	-	20	18	370	-	1620	215	23880	-	47606	4116	0.228	0.316	469.101
ID20-27_spot5	1352	1540	1583	1622	38	50	22	34	500	50	910	260	27917	2659	31447	13886	0.549	0.381	482.643
ID20-27_spot1	1353	-	1582	1621	50	-	22	18	215	-	1275	85	11432	-	41215	1627	0.169	0.211	564.092
																mean:	0.426389	0.403167	427.484
																1σ (internal):	0.149598	0.071325	47.6258
																1 SE (internal):	0.0352605	0.0168115	11.2255
																		prop. 2 SE (internal and external):	32.5516
																		n:	18
ID20-29A_spot14	1344	-	1584	1614	70	-	21	35	105	-	620	180	10800	-	20452	6700	0.169	0.285	485.134
ID20-29A_spot12	1340	-	1584	1616	70	-	21	25	40	-	480	100	4398	-	13277	2659	0.083	0.216	532.907
ID20-29A_spot18	1347	-	1583	1612	70	-	19	35	70	-	820	120	6454	-	23683	4467	0.085	0.214	535.656
ID20-29A_spot15	1345	-	1583	1612	70	-	19	28	65	-	650	110	5993	-	18773	3275	0.1	0.214	540.246
ID20-29A_spot17	1340	-	1583	1616	70	-	19	25	50	-	540	90	4610	-	15596	2393	0.093	0.204	548.778
ID20-29A_spot10	1340	-	1583	1612	70	-	18	28	55	-	770	100	5071	-	21068	2978	0.071	0.174	574.019
ID20-29A_spot2	1340	-	1583	1621	63	-	18	17	50	-	950	40	4149	-	25993	723	0.053	0.134	611.103
ID20-29A_spot7	1348	-	1583	1618	50	-	18	18	55	-	1100	80	3622	-	29093	1531	0.05	0.106	640.041
ID20-29A_spot16	1345	-	1583	1615	60	-	19	19	30	-	860	40	2371	-	24009	808	0.035	0.087	655.604
ID20-29A_spot9	1340	-	1583	1617	50	-	18	18	30	-	700	60	1976	-	19153	1149	0.043	0.089	655.987
ID20-29A_spot8	1352	-	1583	1615	50	-	18	19	40	-	1050	60	2634	-	27770	1212	0.038	0.083	660.817
ID20-29A_spot3	1350	-	1582	1619	50	-	18	17	45	-	1130	45	2393	-	30918	814	0.04	0.07	675.317
ID20-29A_spot5	1348	-	1582	1615	50	-	18	19	40	-	1190	50	2127	-	31473	1010	0.034	0.061	683.03
																mean:	0.0687692	0.149	599.895
																1σ (internal):	0.0366567	0.0695834	63.8045
																1 SE (internal):	0.0101667	0.019299	17.6962
																		prop. 2 SE (internal and external):	44.965
																		n:	13
ID20-36B_spot16	1359	-	1595	1623	38	-	23	10	550	-	2180	50	29649	-	73672	532	0.252	0.287	506.817
ID20-36B_spot3	1359	-	1597	1620	38	-	18	0	620	-	2900	-	31032	-	81996	-	0.214	0.275	508.855
ID20-36B_spot6	1359	-	1594	1623	38	-	22	8	450	-	2180	80	22523	-	63170	681	0.206	0.261	521.496
ID20-36B_spot8	1359	-	1585	1622	38	-	27	15	520	-	2070	150	26027	-	70779	2393	0.251	0.262	533.212
ID20-36B_spot2	1357	-	1591	1624	38	-	25	11	540	-	1940	150	23905	-	63881	1755	0.278	0.267	535.389
ID20-36B_spot9	1358	-	1591	1622	38	-	27	-	390	-	1670	-	21024	-	61677	-	0.234	0.254	536.957
ID20-36B_spot18	1357	-	1587	1622	38	-	27	-	230	-	1130	-	12399	-	38638	-	0.204	0.243	540.127
ID20-36B_spot7	1359	-	1585	1622	38	-	24	10	280	-	1320	80	14014	-	44941	851	0.212	0.234	552.029
ID20-36B_spot17	1358	-	1586	1623	38	-	27	10	230	-	1280	50	12399	-	43767	532	0.18	0.219	558.776
ID20-36B_spot1	1359	-	1587	1625	40	-	29	9	310	-	1650	90	16962	-	60597	861	0.188	0.216	564.307
																mean:	0.2219	0.2518	535.796
																1σ (internal):	0.0294702	0.0222567	18.4432
																1 SE (internal):	0.00931928	0.00703818	5.83226
																		prop. 2 SE (internal and external):	33.7055
																		n:	10
ID20-37A_spot7	1355	-	1582	1615	40	-	19	25	80	-	380	30	4215	-	9510	798	0.211	0.29	491.99
ID20-37A_spot6	1354	-	1581	1620	50	-	20	20	135	-	980	40	9918	-	27805	851	0.138	0.257	505.83
ID20-37A_spot9	1356	-	1581	1623	32	-	19	10	150	-	650	190	6566	-	17520	2792	0.231	0.273	515.834
ID20-37A_spot2	1354	-	1581	1620	44	-	17.5	14	220	-	1500	110	12259	-	41233	1638	0.147	0.222	545.856
ID20-37A_spot1	1354	-	1580	1619	38	-	22.5	10	120	-	800	40	6700	-	25535	425	0.15	0.205	564.886
ID20-37A_spot4	1353	-	1580	1620	44	-	22	15	75	-	430	10	3509	-	12940	160	0.174	0.211	565.558
ID20-37A_spot5	1353	-	1581	1620	44	-	20	10	75	-	540	18	3509	-	15869	191	0.139	0.179	589.354
ID20-37A_spot8	1360	-	1581	1621	35	-	19	22	90	-	580	40	3829	-	16192	936	0.155	0.183	589.841
ID20-37A_spot15	1350	-	1581	1618	45	-	20	18	120	-	850	70	5743	-	24979	1340	0.141	0.179	589.951
ID20-37A_spot10	1353	-	1582	1621	40	-	23	20	150	-	1070	40	7294	-	34912	851	0.14	0.169	600.322
ID20-37A_spot18	1352	-	1580	1620	45	-	20	10	35	-	310	3	2074	-	8795	32	0.223	0.19	602.121
ID20-37A_spot11	1353	-	1581	1620	50	-	19	10	75	-	860	48	4559	-	24838	754	0.087	0.151	603.491
ID20-37A_spot17	1350	-	1580	1620	45	-	22	12	40	-	400	15	1914	-	11591	191	0.1	0.14	619.204
ID20-37A_spot14	1353	-	1582	1620	42	-	20	15	100	-	1020	20	4467	-	29974	319	0.098	0.128	631.398
ID20-37A_spot3	1355	-	1581.5	1620	44	-	17.5	18	60	-	700	70	2808	-	19242	1340	0.086	0.12	636.261
ID20-37A_spot13	1355	-	1581	1618	40	-	20	20	95	-	1000	25	4041	-	28372	785	0.095	0.122	636.884
ID20-37A_spot12	1353	-	1581	1622	45	-	19	10	75	-	1050	15	3589	-	30325	236	0.071	0.105	647.642
ID20-37A_spot16	1350	-	1580	1620	45	-	22	12	50	-	1070	50	2393	-	31005	638	0.047	0.07	677.514
																mean:	0.135167	0.177444	589.663
																1σ (internal):	0.0504703	0.0577237	49.2658
																1 SE (internal):	0.011896	0.0136056	11.6121
																		prop. 2 SE (internal and external):	33.0895
																		n:	18
ID20-53_spot10	1349	-	1581	1622	53	-	22	19	260	-	630	50	19548	-	21771	1010	0.413	0.462	363.123
ID20-53_spot7	1350	-	1581	1621	41	-	21	19	600	-	1130	110	36146	-	37275	2223	0.531	0.478	374.935
ID20-53_spot17	1351	-	1581	1618	43	-	20	25	690	-	1480	120	39079	-	44994	3190	0.466	0.448	391.312
ID20-53_spot2	1350	-	1581	1620	42	-	21	20	880	-	1650	150	46806	-	52670	3190	0.533	0.456	398.879
ID20-53_spot6	1349	-	1581	1622	40	-	21	16	600	-	1130	120	32829	-	37275	2042	0.531	0.455	399.476
ID20-53_spot3	1349	-	1581	1620	45	-	21	20	330	-	930	30	21820	-	30678	638	0.355	0.411	402.52
ID20-53_spot16	1350	1550	1581	1621	45	50	19	19	730	10	1800	130	39935	532	53721	2627	0.406	0.415	411.488
ID20-53_spot8	1349	-	1581	1622	48	-	20	16	320	-	950	70	20231	-	29845	1191	0.337	0.395	414.82
ID20-53_spot9	1350	-	1581	1620	43	-	21	19	600	-	1550	80	32673	-	47827	1616	0.387	0.398	424.745
ID20-53_spot11	1349	-	1581	1621	43	-	21	16	680	-	1580	120	35546	-	50436	2042	0.43	0.404	429.309
ID20-53_spot1	1350	-	1581	1620	39	-	20	20	690	-	1880	100	35444	-	55247	2127	0.367	0.382	436.615
ID20-53_spot18	1351	-	1581	1622	45	-	20	13	730	-	2900	140	44934	-	88164	1936	0.252	0.333	457.735
ID20-53_spot4	1351	-	1581	1620	42	-	20	17	620	-	2070	100	32977	-	62931	1808	0.3	0.337	466.734
ID20-53_spot15	1351	1550	1581	1622	40	50	19	12	430	10	1700	90	22655	532	47459	1696	0.253	0.323	468.685
ID20-53_spot19	1352	-	1581	1622	43	-	20	15	600	-	2650	120	31364	-	77875	1914	0.226	0.282	504.811
ID20-53_spot14	1348	1550	1579	1621	90	50	22	29	130	10	1720	50	15410	532	55600	2278	0.076	0.217	529.684
																mean:	0.366437	0.38725	429.68
																1σ (internal):	0.121312	0.0699585	44.3344
																1 SE (internal):	0.030328	0.0174896	11.0836
																		prop. 2 SE (internal and external):	33.4123
																		n:	16
ID20-61A_spot15	1350	-	1581	1618	43	-	20	22	200	-	1230	110	11327	-	33650	2574	0.163	0.238	533.518
ID20-61A_spot3	1349	-	1581.5	1619	45	-	18	21	165	-	1310	100	9780	-	35245	2233	0.126	0.207	555.584
ID20-61A_spot9	1351	-	1581	1619	42	-	20	20	190	-	1360	100	10511	-	38586	100	0.14	0.205	561.91
ID20-61A_spot6	1350	-	1581.5	1618	40	-	20	19	170	-	1260	95	9301	-	35749	1920	0.135	0.198	567.886
ID20-61A_spot12	1350	-	1581	1616	45	-	20	25	175	-	1290	85	9573	-	36600	2260	0.136	0.198	568.185
ID20-61A_spot4	1351	-	1581	1619	42	-	20	21	140	-	1350	70	7745	-	38302	1563	0.104	0.163	595.88
ID20-61A_spot16	1348	-	1581	1618	43	-	20	20	110	-	1130	70	6230	-	30914	1489	0.097	0.161	595.882
ID20-61A_spot17	1349	-	1581.5	1618	40	-	18	20	110	-	1170	60	5795	-	29876	1276	0.094	0.157	599.233
ID20-61A_spot1	1350	-	1581	1620	40	-	20	15	125	-	1340	50	7347	-	39378	798	0.093	0.155	601.061
ID20-61A_spot10	1351	-	1581.5	1619	42	-	19	20	145	-	1560	75	8021	-	42047	1595	0.093	0.155	601.061
ID20-61A_spot18	1351	-	1581	1620	40	-	20	17	120	-	1170	60	6322	-	33195	1085	0.103	0.156	603.045
ID20-61A_spot11	1352	-	1581.5	1619	40	-	19	20	145	-	1560	75	7639	-	42047	1595	0.093	0.149	607.463
ID20-61A_spot14	1351	-	1582	1618	40	-	19	18	130	-	1240	65	6321	-	34617	1244	0.105	0.15	610.055
ID20-61A_spot2	1351	-	1581.5	1618	40	-	20	15	115	-	1310	70	6292	-	37167	1117	0.088	0.141	614.468
ID20-61A_spot13	1351	-	1581	1618	40	-	20	18	105	-	1230	65	5106	-	33650	1244	0.085	0.128	627.418
ID20-61A_spot5	1352	-	1581.5	1619	38	-	20	19	120	-	1430	60	5543	-	40572	1212	0.084	0.117	638.848
																mean:	0.108688	0.167375	592.594
																1σ (internal):	0.0229475	0.0314998	27.0212
																1 SE (internal):	0.00573689	0.00787494	6.75529
																		prop. 2 SE (internal and external):	28.4172
																		n:	16
ID20-62B_spot8	1350	-	1581.5	1616	40	-	18	22	285	-	2200	135	15594	-	58186	3159	0.13	0.203	561.053
ID20-62B_spot7	1350	-	1581	1616	40	-	19.5	26	260	-	2010	130	14753	-	55602	3595	0.129	0.2	563.954
ID20-62B_spot16	1349	-	1581	1618	40	-	19.5	18	220	-	1740	120	11591	-	48133	2297	0.126	0.187	576.924
ID20-62B_spot10	1351	-	1581	1616	40	-	18	20	225	-	1900	105	11854	-	50251	2233	0.118	0.184	577.715
ID20-62B_spot17	1348	-	1581	1614	40	-	19.5	25	140	-	1170	110	7944	-	32365	2925	0.12	0.184	578.319
ID20-62B_spot1	1350	-	1582	1615	42	-	18	22	355	-	3255	185	19638	-	86088	4328	0.109	0.178	581.394
ID20-62B_spot9	1351	-	1581.5	1616	40	-	18	22	325	-	2900	135	17123	-	76699	3159	0.112	0.177	583.37
ID20-62B_spot14	1349	-	1581	1615	45	-	18.5	22	170	-	1650	80	9300	-	43303	1872	0.103	0.171	587.04
ID20-62B_spot11	1349	-	1581	1615	41	-	19	25	155	-	1470	100	8693	-	39621	2659	0.105	0.171	587.648
ID20-62B_spot6	1348	-	1581.5	1614	45	-	19	26	165	-	1600	165	9780	-	43125	4562	0.103	0.17	588.107
ID20-62B_spot15	1349	-	1581	1613	40	-	20	25	135	-	1210	100	6565	-	33102	2659	0.112	0.165	596.174
ID20-62B_spot5	1351	-	1581	1616	37	-	19	22	295	-	2600	125	14377	-	70079	2925	0.113	0.165	596.477
ID20-62B_spot12	1348	-	1580.5	1615	41	-	18	25	125	-	1450	100	7010	-	37025	2659	0.086	0.15	604.251
ID20-62B_spot18	1348	-	1581	1614	40	-	19.5	25	120	-	1320	80	6809	-	36515	2127	0.091	0.15	605.784
ID20-62B_spot3	1344	-	1581	1613	57	-	19	25	95	-	1450	95	5759	-	37685	2526	0.066	0.133	616.217
ID20-62B_spot13	1348	-	1581	1615	51	-	18.5	25	70	-	1050	80	4340	-	28542	2127	0.067	0.124	626.13
ID20-62B_spot4	1350	-	1581	1613	47	-	19	25	105	-	1570	95	5248	-	42317	2526	0.067	0.105	646.403
ID20-62B_spot2	1350	-	1581	1613	37	-	19	25	145	-	2050	125	5706	-	53278	3323	0.071	0.092	661.513
																mean:	0.101556	0.161611	596.582
																1σ (internal):	0.021253	0.0299651	25.9821
																1 SE (internal):	0.00500939	0.00706283	6.12404
																		prop. 2 SE (internal and external):	26.5626
																		n:	18
ID20-63B_spot6	1348	-	1581	1618	47	-	17.5	15	130	-	1520	50	8668	-	39759	798	0.086	0.179	573.308
ID20-63B_spot15	1350	-	1581	1620	45	-	17	19	125	-	1480	60	7409	-	38245	1212	0.084	0.158	595.101
ID20-63B_spot13	1345	-	1581.5	1620	60	-	17	15	50	-	1650	20	4712	-	40503	319	0.03	0.103	636.953
ID20-63B_spot10	1350	-	1581	1622	50	-	17	12	70	-	1750	20	4965	-	42958	255	0.04	0.103	640.106
ID20-63B_spot3	1345	-	1581	1623	60	-	17	5	50	-	1670	30	4256	-	41714	160	0.03	0.092	648.69
ID20-63B_spot12	1355	-	1581	1620	60	-	17	15	40	-	1550	50	3770	-	38048	798	0.026	0.088	651.693
ID20-63B_spot9	1340	-	1581	1622	60	-	17	12	40	-	1850	40	3405	-	45413	510	0.022	0.069	670.698
ID20-63B_spot16	1350	-	1581	1620	45	-	17	19	55	-	1680	10	3260	-	41964	202	0.033	0.072	670.978
ID20-63B_spot7	1359	-	1582	1622	37	-	17	12	40	-	1420	60	2100	-	34857	766	0.028	0.056	686.47
ID20-63B_spot1	1357	-	1581.5	1620	30	-	17	10	50	-	1370	35	2128	-	34221	372	0.036	0.058	686.862
ID20-63B_spot2	1355	-	1581	1620	30	-	17	10	55	-	1670	20	2341	-	41714	213	0.033	0.053	691.251
ID20-63B_spot5	1350	-	1581	1620	45	-	16.5	15	30	-	1750	20	1915	-	43159	319	0.017	0.042	697.918
ID20-63B_spot18	1350	-	1581.5	1620	40	-	17	13	20	-	1680	10	1054	-	41964	138	0.012	0.024	715.531
ID20-63B_spot4	-	-	1582	1620	-	-	16.5	15	-	-	1600	30	-	-	39460	479	0.001	0	737.621
ID20-63B_spot8	-	-	1581	1622	-	-	17	12	-	-	1600	40	-	-	39276	510	0.001	0	737.621
ID20-63B_spot11	-	-	1581	1620	-	-	17	15	-	-	1570	40	-	-	38539	638	0.001	0	737.621
ID20-63B_spot14	-	-	1582	1620	-	-	17	15	-	-	1620	40	-	-	39767	638	0.001	0	737.621
ID20-63B_spot17	-	-	1581.5	1620	-	-	17	13	-	-	1600	40	-	-	39966	553	0.001	0	737.621
																mean:	0.0267778	0.0609444	680.759
																1σ (internal):	0.0244962	0.0522648	48.5195
																1 SE (internal):	0.0057738	0.0123189	11.4362
																		prop. 2 SE (internal and external):	32.8436
																		n:	18
ID20-64_spot3	1356	-	1581	1622	44	-	19.5	12	155	-	1000	80	8291	-	28652	1021	0.155	0.218	552.496
ID20-64_spot1	1349	-	1580	1620	53	-	19.5	20	170	-	1570	30	10953	-	44984	638	0.108	0.194	564.019
ID20-64_spot4	1355	-	1582	1624	40	-	18	11	155	-	910	80	6594	-	24068	936	0.17	0.209	566.52
ID20-64_spot11	1356	-	1580	-	100	-	19	-	35	-	1590	-	5498	-	44389	-	0.022	0.11	626.951
ID20-64_spot12	1351	-	1580	-	50	-	19	-	80	-	1310	-	4254	-	36572	-	0.061	0.104	645.607
ID20-64_spot5	1355	-	1581	-	50	-	19	-	20	-	420	-	1063	-	10916	-	0.0476	0.0888	657.643
ID20-64_spot17	1355	-	1580	-	40	-	20	-	45	-	1620	-	2827	-	49250	-	0.028	0.054	688.604
ID20-64_spot15	1340	-	1581	-	40	-	18	-	25	-	1030	-	1165	-	27241	-	0.024	0.041	701.208
ID20-64_spot8	1356	-	1580	-	50	-	19	-	30	-	1470	-	1595	-	41038	-	0.02	0.037	704.207
ID20-64_spot10	1356	-	1580	-	100	-	18.5	-	8	-	1050	-	851	-	28542	-	0.008	0.029	708.919
ID20-64_spot16	1350	-	1579	-	100	-	18	-	5	-	1530	-	582	-	39068	-	0.003	0.015	722.257
ID20-64_spot9	1356	-	1581	-	100	-	16	-	2	-	850	-	213	-	19983	-	0.002	0.011	726.204
ID20-64_spot14	1350	-	1581	-	50	-	19	-	6	-	1250	-	349	-	33692	-	0.005	0.01	728.232
																mean:	0.0502769	0.0862154	660.99
																1σ (internal):	0.0555121	0.0735188	62.3751
																1 SE (internal):	0.0153963	0.0203905	17.2998
																		prop. 2 SE (internal and external):	44.3436
																		n:	13
ID20-80A_spot4	1340	-	1581	1619	75	-	18	19	95	-	1050	120	9746	-	27770	2425	0.09	0.244	505.18
ID20-80A_spot18	1349	-	1580.5	1620	41	-	17	16	130	-	920	80	7291	-	24567	1361	0.141	0.219	547.271
ID20-80A_spot10	1343	-	1581	1619	65	-	18	12	60	-	480	90	4148	-	13572	1696	0.125	0.214	547.815
ID20-80A_spot7	1350	-	1580	1618	45	-	18.5	20	150	-	780	100	7178	-	21935	2127	0.192	0.23	550.53
ID20-80A_spot17	1349	-	1580	1620	41	-	17.5	18	140	-	1010	70	7852	-	27764	1340	0.139	0.212	554.143
ID20-80A_spot2	1340	-	1581	1619	50	-	18	22	55	-	570	75	4320	-	15596	1755	0.096	0.199	555.03
ID20-80A_spot5	1345	-	1580.5	1619	55	-	18	19	65	-	660	70	3802	-	17456	1414	0.098	0.168	588.718
ID20-80A_spot1	1348	-	1580	1619	40	-	18	22	75	-	610	85	3951	-	16690	1989	0.123	0.175	588.826
ID20-80A_spot12	1354	-	1581	1620	40	-	18	17	110	-	750	130	4679	-	19836	2350	0.147	0.174	597.072
ID20-80A_spot13	1340	-	1581	1618	60	-	17	25	40	-	610	80	2552	-	15237	2127	0.066	0.128	621.552
ID20-80A_spot16	1355	-	1582	1620	30	-	17.5	15	100	-	680	140	3647	-	18692	2233	0.147	0.148	624.814
ID20-80A_spot6	1350	-	1581	1618	45	-	17	20	95	-	1150	140	4546	-	29221	2978	0.083	0.124	631.071
ID20-80A_spot3	1343	-	1581	1619	70	-	17	20	80	-	2450	120	5955	-	61198	2552	0.033	0.085	657.107
ID20-80A_spot14	1353	-	1582	1620	40	-	18	13	110	-	1630	150	4679	-	44599	2074	0.067	0.091	661.341
ID20-80A_spot9	1350	-	1582	1618	45	-	17	20	100	-	2400	100	4786	-	62019	2127	0.042	0.069	677.013
ID20-80A_spot11	1351	-	1581	1620	40	-	18	14	100	-	2200	160	4254	-	56177	2609	0.045	0.067	680.088
ID20-80A_spot15	1353	-	1581	1620	30	-	17.5	13	110	-	1810	150	3509	-	46541	2074	0.061	0.067	685.086
																mean:	0.0997059	0.153765	604.274
																1σ (internal):	0.0435819	0.0598189	54.0541
																1 SE (internal):	0.0105702	0.0145082	13.1101
																		prop. 2 SE (internal and external):	35.7173
																		n:	17
ID20-81_spot18	1351	-	1582	1621	45	-	23	20	430	-	1100	80	25487	-	38458	1702	0.391	0.388	436.448
ID20-81_spot9	1352	-	1582	1621	44	-	23	20	420	-	1370	90	24341	-	46299	1914	0.307	0.335	470.771
ID20-81_spot5	1352	-	1581	1620	44	-	23.5	19	300	-	1030	50	17386	-	35565	1010	0.291	0.322	480.279
ID20-81_spot11	1354	-	1582	1621	45	-	24	15	280	-	1130	60	15957	-	38472	957	0.248	0.288	504.628
ID20-81_spot6	1353	-	1582	1621	44	-	24	10	200	-	880	30	11591	-	30497	319	0.227	0.275	512.564
ID20-81_spot12	1352	-	1582	1621	45	-	23	15	230	-	1150	60	13107	-	37522	957	0.2	0.254	527.236
ID20-81_spot10	1353	-	1581	1621	44	-	23	18	300	-	1620	40	17386	-	52857	766	0.185	0.245	532.492
ID20-81_spot3	1352	-	1581	1620	44	-	24	19	300	-	1510	60	17386	-	51410	1212	0.199	0.248	533.35
ID20-81_spot15	1353	-	1581	1621	45	-	23	20	190	-	1030	30	10828	-	34808	638	0.184	0.237	540.737
ID20-81_spot17	1353	-	1581	1621	45	-	23	12	190	-	970	40	10394	-	32781	510	0.196	0.238	543.153
ID20-81_spot4	1353	-	1581	1620	44	-	23.5	19	160	-	920	20	9273	-	30670	404	0.174	0.23	545.285
ID20-81_spot1	1351	-	1581	1620	50	-	24	14	185	-	900	30	9978	-	31190	447	0.141	0.219	547.271
ID20-81_spot2	1351	-	1580	1618	43	-	24	19	150	-	870	20	8496	-	28561	404	0.172	0.227	547.9
ID20-81_spot16	1353	-	1581	1621	45	-	23	18	530	-	3030	90	30204	-	102398	1723	0.175	0.225	550.913
ID20-81_spot13	1352	-	1580	1621	45	-	23	25	190	-	1260	20	10828	-	42581	532	0.151	0.203	567.316
ID20-81_spot7	1353	-	1581	1623	44	-	23	10	160	-	1500	25	9273	-	48942	266	0.107	0.159	601.06
ID20-81_spot8	1353	-	1581	1623	44	-	23	10	160	-	1700	25	9273	-	55467	266	0.094	0.143	614.171
ID20-81_spot14	1353	-	1581	1621	45	-	23	30	160	-	1730	25	9118	-	54427	798	0.092	0.142	614.626
																mean:	0.196333	0.243222	537.233
																1σ (internal):	0.074168	0.0619906	45.3564
																1 SE (internal):	0.0174816	0.0146113	10.6906
																		prop. 2 SE (internal and external):	31.8231
																		n:	18
ID20-83_spot10	1351	-	1582	1621	46	-	24	18	360	-	900	80	26012	-	28450	1531	0.4	0.465	356.603
ID20-83_spot8	1348	-	1582	1619	45	-	24	18	470	-	910	100	28930	-	28766	1914	0.516	0.485	363.919
ID20-83_spot5	1349	-	1582	1619	47	-	24	20	520	-	1190	120	32191	-	37617	2552	0.437	0.445	387.319
ID20-83_spot7	1351	-	1581	1618	45	-	24	23	550	-	1130	140	33855	-	38472	3424	0.487	0.447	397.504
ID20-83_spot12	1352	-	1582	1621	42	-	24	18	540	-	1100	85	29873	-	38790	1627	0.491	0.425	421.947
ID20-83_spot15	1352	-	1582	1619	45	-	25	19	370	-	990	100	24464	-	35110	2021	0.374	0.397	422.438
ID20-83_spot18	1352	-	1581	1619	38	-	26	19	510	-	980	110	28476	-	37439	2223	0.52	0.418	436.357
ID20-83_spot16	1353	-	1581.5	1619	43	-	25	19	400	-	1180	70	22655	-	41849	1414	0.339	0.344	469.77
ID20-83_spot13	1352	-	1582.5	1617	39	-	24.5	19	310	-	980	105	17151	-	34061	2122	0.316	0.322	487.078
																mean:	0.431111	0.416444	415.882
																1σ (internal):	0.0728902	0.0510209	41.9518
																1 SE (internal):	0.0242967	0.017007	13.9839
																		prop. 2 SE (internal and external):	43.5122
																		n:	9
ID21-3B_spot16	1348	-	1582	1623	41	-	18	15	115	-	395	18	6210	-	10808	356	0.291	0.357	442.934
ID21-3B_spot13	1348	-	1580	1624	41	-	18	10	210	-	870	50	12214	-	23407	659	0.241	0.337	450.374
ID21-3B_spot7	1349	-	1581	1623	48	-	20	21	64	-	345	20	4825	-	10488	553	0.186	0.304	469.83
ID21-3B_spot9	1351	-	1580.5	1623	50	-	21	17	61	-	347	30	4791	-	11077	672	0.176	0.29	481.851
ID21-3B_spot3	1349	-	1580.5	1622	47	-	19	18	85	-	460	30	5667	-	13285	711	0.185	0.288	486.611
ID21-3B_spot6	1352	-	1581	1622	37	-	19	15	97	-	500	5	5273	-	14441	99	0.194	0.267	511.631
ID21-3B_spot14	1351	-	1580	1620	40	-	21	20	100	-	410	30	5269	-	12869	790	0.244	0.278	514.173
ID21-3B_spot1	1349	-	1582	1621	62	-	21	15	50	-	590	11	4712	-	17576	175	0.085	0.21	539.924
ID21-3B_spot10	1352	-	1580.5	1620	43	-	18	13	48	-	365	32	2719	-	9987	548	0.132	0.205	559.519
ID21-3B_spot4	1349	-	1581.5	1622	53	-	21	15	49	-	530	15	3948	-	16354	296	0.092	0.192	561.276
ID21-3B_spot12	1348	-	1580	1621	41	-	19	18	53	-	510	50	3083	-	14729	1185	0.104	0.162	596.947
ID21-3B_spot8	1352	-	1580	1623	47	-	19	8	65	-	1130	45	4799	-	31547	474	0.058	0.13	616.931
ID21-3B_spot2	1354	-	1580.5	1623	43	-	21	20	48	-	695	35	3033	-	20704	922	0.069	0.123	627.817
ID21-3B_spot15	1351	-	1582	1624	43	-	18	20	40	-	750	25	2265	-	20521	659	0.053	0.097	650.582
ID21-3B_spot11	1353	-	1580	1617	30	-	18	13	61	-	750	5	2410	-	20521	86	0.081	0.105	650.729
																mean:	0.146067	0.223	544.075
																1σ (internal):	0.0735404	0.0835911	69.296
																1 SE (internal):	0.0189881	0.0215831	17.8922
																		prop. 2 SE (internal and external):	44.1269
																		n:	15
ID21-4A_spot12	1356	-	1581	1617	58	-	20	20	27	-	215	8	2222	-	6318	211	0.126	0.254	505.435
ID21-4A_spot16	1353	-	1581	1627	40	-	20	12	95	-	620	20	5391	-	18849	316	0.153	0.22	549.77
ID21-4A_spot1	1344	-	1581	1621	50	-	20	11	91	-	725	85	5993	-	21305	1232	0.126	0.21	552.383
ID21-4A_spot3	1350	-	1581	1621	47	-	21	21	72	-	495	45	4457	-	15274	1245	0.145	0.212	555.931
ID21-4A_spot11	1349	-	1582	-	55	-	20	-	26	-	325	-	2029	-	9221	-	0.08	0.18	570.396
ID21-4A_spot15	1359	-	1581	-	51	-	22	-	29	-	355	-	2173	-	11872	-	0.082	0.155	597.687
ID21-4A_spot8	1355	-	1582	1621	35	-	21	20	56	-	460	18	2780	-	13704	474	0.122	0.164	600.262
ID21-4A_spot9	1355	-	1582	1619	50	-	22	20	31	-	365	11	2199	-	12206	290	0.085	0.153	600.743
ID21-4A_spot5	1351	-	1581	1623	45	-	24	10	65	-	690	10	4001	-	23492	132	0.094	0.145	612.037
ID21-4A_spot10	1355	-	1582	-	48	-	22	-	25	-	340	-	1702	-	10991	-	0.074	0.134	617.627
ID21-4A_spot13	1356	-	1581	-	50	-	20	-	32	-	510	-	2270	-	15505	-	0.063	0.128	620.621
ID21-4A_spot14	1359	-	1582.5	1625	45	-	19	10	47	-	670	50	3000	-	19350	659	0.07	0.13	620.658
ID21-4A_spot6	1353	-	1581	1621	45	-	22	18	45	-	600	45	2770	-	18726	1067	0.075	0.123	629.673
ID21-4A_spot4	1353	-	1580	1621	43	-	21	11	31	-	485	17	1756	-	14448	246	0.064	0.107	643.338
																mean:	0.0970714	0.165357	591.183
																1σ (internal):	0.0297621	0.0420299	37.3547
																1 SE (internal):	0.00795425	0.011233	9.98346
																		prop. 2 SE (internal and external):	33.3611
																		n:	14
ID21-5A_spot2	1350	-	1581	1622	41	-	19	13	97	-	390	25	5238	-	10888	428	0.249	0.316	475.032
ID21-5A_spot1	1352	-	1580.51	1623	43	-	19	10	150	-	830	55	8823	-	23971	724	0.181	0.263	512.12
ID21-5A_spot3	1350	-	1581	1622	50	-	19	11	61	-	480	28	4172	-	13400	406	0.127	0.232	529.21
ID21-5A_spot7	1356	-	1581	1622	32	-	16	8	86	-	580	50	3904	-	14106	527	0.148	0.211	557.89
ID21-5A_spot6	1350	-	1581	1623	39	-	17	11	61	-	510	60	3375	-	13179	869	0.12	0.194	567.649
ID21-5A_spot13	1352	-	1581	1621	40	-	19	13	32	-	280	10	1686	-	7817	171	0.114	0.174	587.177
ID21-5A_spot8	1356	-	1581	1622	41	-	17	11	36	-	490	15	2094	-	12662	217	0.073	0.14	610.916
ID21-5A_spot12	1356	-	1581	1625	40	-	19	10	80	-	910	40	4377	-	25405	527	0.088	0.144	611.267
ID21-5A_spot4	1352	-	1580.5	1622	45	-	19	19	65	-	940	35	4149	-	27148	876	0.069	0.129	621.415
ID21-5A_spot11	1356	-	1581	1622	43	-	20	12	32	-	550	10	1952	-	16163	158	0.058	0.108	640.405
ID21-5A_spot10	1353	-	1581	1625	35	-	20	12	57	-	820	22	2830	-	24097	348	0.07	0.104	648.4
ID21-5A_spot15	1353	-	1580	-	43	-	20	-	30	-	510	-	1699	-	15246	-	0.059	0.1	649.252
ID21-5A_spot16	1353	-	1582	1620	46	-	19	12	18	-	375	24	1091	-	10108	379	0.048	0.094	652.219
ID21-5A_spot5	1352	-	1581	-	43	-	19	-	39	-	1160	-	2379	-	33502	-	0.034	0.066	677.695
ID21-5A_spot17	1346	-	1580	-	46	-	17	-	17	-	860	-	1030	-	21111	-	0.02	0.047	693.537
ID21-5A_spot14	1353	-	1580	-	35	-	19	-	21	-	990	-	968	-	28115	-	0.021	0.033	708.792
																mean:	0.0924375	0.147187	608.936
																1σ (internal):	0.0598727	0.0768938	64.4746
																1 SE (internal):	0.0149682	0.0192234	16.1187
																		prop. 2 SE (internal and external):	40.7951
																		n:	16
ID21-10_spot17	1348	-	1581.5	1620	45	-	19	16	50	-	450	25	2849	-	12129	527	0.111	0.184	575.598
ID21-10_spot9	1346	-	1582	-	55	-	18	-	36	-	540	-	2507	-	14528	-	0.067	0.147	601.589
ID21-10_spot16	1348	-	1581.5	-	55	-	16	-	12	-	310	-	836	-	7036	-	0.039	0.106	636.59
ID21-10_spot1	1355	-	1580.5	1623	55	-	17	17	30	-	720	40	2173	-	17364	896	0.042	0.106	637.534
ID21-10_spot14	1355	-	1581	-	50	-	17	-	33	-	975	-	2090	-	24354	-	0.034	0.079	663.824
ID21-10_spot2	1362	-	1580.5	1619	55	-	16.5	16	24	-	1030	20	1739	-	24109	421	0.023	0.066	674.216
ID21-10_spot13	1348	-	1581	1620	55	-	17	18	8	-	310	12	557	-	7743	285	0.026	0.065	676.234
ID21-10_spot10	1335	-	1581	-	55	-	16	-	25	-	1350	-	1741	-	31738	-	0.019	0.052	687.884
ID21-10_spot15	1355	-	1581.5	-	45	-	17	-	15	-	995	-	855	-	25283	-	0.015	0.033	706.884
ID21-10_spot6	1346	-	1581	1620	45	-	18	10	8	-	750	10	456	-	19151	132	0.011	0.023	716.279
ID21-10_spot12	1355	-	1578	-	50	-	18	-	8	-	910	-	507	-	24068	-	0.009	0.021	717.775
																mean:	0.036	0.0801818	663.128
																1σ (internal):	0.0285848	0.049361	44.1503
																1 SE (internal):	0.00861864	0.0148829	13.3118
																		prop. 2 SE (internal and external):	40.2232
																		n:	11
ID21-11_spot13	1355	-	1581.5	1622	45	-	17	10	39	-	620	10	2312	-	16021	132	0.063	0.125	623.822
ID21-11_spot12	1353	-	1581.5	-	55	-	19	-	21	-	425	-	1521	-	12275	-	0.049	0.11	635.46
ID21-11_spot6	1335	-	1581	1622	62	-	19	15	15	-	410	13	1178	-	11051	257	0.037	0.094	648.765
ID21-11_spot5	1348	-	1581	1623	55	-	19	21	15	-	360	14	1045	-	9877	387	0.042	0.092	652.472
ID21-11_spot3	1353	-	1581	1622	50	-	19	19	29	-	800	40	1836	-	21563	1001	0.036	0.075	668.723
ID21-11_spot15	1350	-	1581.5	1621	55	-	16	12	11	-	430	10	797	-	10109	158	0.026	0.072	668.765
ID21-11_spot10	1345	-	1581	1618	55	-	18	15	13	-	470	18	905	-	11572	356	0.028	0.071	670.465
ID21-11_spot14	1355	-	1581.5	-	50	-	16	-	6	-	240	-	395	-	5642	-	0.025	0.065	675.917
ID21-11_spot7	1340	-	1583	-	50	-	17	-	23	-	980	-	1456	-	24056	-	0.023	0.057	683.819
ID21-11_spot8	1355	-	1580.5	-	45	-	17	-	24	-	1090	-	1368	-	25347	-	0.022	0.051	689.904
ID21-11_spot11	1349	-	1581.5	-	55	-	18	-	11	-	750	-	766	-	19836	-	0.015	0.037	702.616
																mean:	0.0332727	0.0771818	665.521
																1σ (internal):	0.0132945	0.024848	22.4666
																1 SE (internal):	0.00400844	0.00749194	6.77393
																		prop. 2 SE (internal and external):	33.055
																		n:	11
ID21-12_spot2	1348	-	1580.5	1621	45	-	19	14	63	-	600	13	3734	-	17329	240	0.105	0.175	583.38
ID21-12_spot12	1352	-	1580	1623	38	-	18	11	85	-	1000	15	4090	-	26448	217	0.085	0.133	622.083
ID21-12_spot17	1356	-	1580	1620	39	-	19	10	46	-	890	10	2272	-	23989	132	0.052	0.086	662.007
ID21-12_spot10	1356	-	1581.5	1620	46	-	18	13	29	-	710	35	1689	-	18778	599	0.041	0.08	664.961
ID21-12_spot15	1356	-	1581	1622	38	-	18	10	35	-	750	27	1684	-	19836	356	0.047	0.077	670.045
ID21-12_spot11	1352	-	1580	-	46	-	18	-	31	-	950	-	1806	-	25126	-	0.033	0.067	676.313
ID21-12_spot5	1358	-	1581	1624	38	-	17	13	24	-	730	10	1155	-	18234	171	0.033	0.059	684.849
ID21-12_spot7	1353	-	1580	1624	39	-	18	13	30	-	890	21	1482	-	23539	360	0.034	0.058	686.231
ID21-12_spot4	1358	-	1580.5	1623	30	-	17	12	38	-	870	21	1444	-	22482	332	0.044	0.06	687.243
ID21-12_spot6	1360	-	1580	1621	35	-	17	13	25	-	810	13	1108	-	20233	223	0.031	0.051	692.753
ID21-12_spot1	1350	-	1580.5	1621	58	-	17	16	12	-	770	21	917	-	19234	443	0.016	0.045	694.399
ID21-12_spot16	1356	-	1580	1620	41	-	17	12	17	-	810	27	883	-	19534	427	0.021	0.042	699.189
ID21-12_spot9	1356	-	1579	-	39	-	18	-	19	-	870	-	938	-	23010	-	0.022	0.039	702.708
																mean:	0.0433846	0.0747692	671.243
																1σ (internal):	0.0244746	0.0374251	32.4916
																1 SE (internal):	0.00678803	0.0103799	9.01155
																		prop. 2 SE (internal and external):	33.0766
																		n:	13
ID21-13_spot12	1353	-	1581	1621	44	-	17	15	97	-	500	12	5405	-	12058	191	0.194	0.306	470.018
ID21-13_spot8	1350	-	1581	1622	43	-	21	10	68	-	310	35	3703	-	9235	372	0.219	0.278	507.084
ID21-13_spot6	1356	-	1580.5	1622	50	-	21	21	23	-	160	25	1515	-	4766	558	0.144	0.221	546.03
ID21-13_spot15	1355	-	1582	1625	43	-	19	10	50	-	380	18	2941	-	10425	191	0.132	0.217	546.715
ID21-13_spot1	1352	-	1580.5	1622	50	-	22	12	55	-	405	50	3343	-	12640	638	0.136	0.201	564.984
ID21-13_spot11	1357	-	1581	1625	41	-	18	10	49	-	420	15	2544	-	10916	160	0.117	0.187	574.212
ID21-13_spot3	1353	-	1580	1620	50	-	21	30	55	-	780	50	3622	-	23237	1595	0.071	0.127	624.168
ID21-13_spot13	1353	-	1581	1618	49	-	21	15	14	-	200	8	869	-	5958	128	0.07	0.125	625.993
ID21-13_spot2	1352	-	1580	1624	55	-	21	10	35	-	620	10	2535	-	18470	106	0.056	0.12	626.978
ID21-13_spot7	1354	-	1579	-	45	-	21	-	27	-	620	-	1600	-	18470	-	0.044	0.08	665.903
																mean:	0.1183	0.1862	575.209
																1σ (internal):	0.0556831	0.0693322	57.7552
																1 SE (internal):	0.0176085	0.0219248	18.2638
																		prop. 2 SE (internal and external):	48.3142
																		n:	10
ID21-15_spot5	1353	-	1581	1627	40	-	20	14	79	-	345	16	4322	-	9788	238	0.229	0.301	485.39
ID21-15_spot10	1355	-	1581	1624	36	-	20	15	110	-	430	26	5618	-	12636	415	0.256	0.301	492.999
ID21-15_spot14	1347	-	1581	1624	40	-	20	11	121	-	520	55	6620	-	15545	643	0.233	0.29	498.262
ID21-15_spot11	1351	-	1582	1622	39	-	21	15	75	-	370	29	4001	-	11417	463	0.203	0.252	530.236
ID21-15_spot3	1355	-	1582	1628	47	-	20	10	40	-	310	10	2667	-	8795	106	0.129	0.231	530.877
ID21-15_spot17	1351	-	1581	1618	50	-	19	35	55	-	590	40	3762	-	16471	1489	0.093	0.173	581.855
ID21-15_spot16	1353	-	1581	-	50	-	19	-	36	-	440	-	2462	-	12284	-	0.082	0.167	584.883
ID21-15_spot1	1356	-	1581	1621	45	-	19	12	80	-	850	20	4924	-	23730	255	0.094	0.17	585.362
ID21-15_spot7	1359	-	1581	1625	33	-	20	18	80	-	630	23	3611	-	18514	440	0.127	0.16	606.034
ID21-15_spot8	1356	-	1581	1624	33	-	20	16	42	-	550	18	1896	-	16442	306	0.076	0.102	652.389
																mean:	0.1522	0.2147	554.829
																1σ (internal):	0.0667695	0.0662783	52.6581
																1 SE (internal):	0.0211144	0.020959	16.652
																		prop. 2 SE (internal and external):	45.9255
																		n:	10
ID21-17_spot17	1346	-	1581	1623	43	-	20	9	157	-	595	50	8549	-	16278	479	0.264	0.338	455.751
ID21-17_spot5	1349	-	1581	1623	45	-	21	10	130	-	540	35	7408	-	16375	372	0.241	0.307	482.384
ID21-17_spot4	1349	-	1581	1624	40	-	20	10	175	-	670	35	8865	-	19349	372	0.261	0.31	484.792
ID21-17_spot3	1351	-	1581	1624	43	-	21	11	93	-	450	30	5267	-	13406	351	0.207	0.277	504.712
ID21-17_spot7	1348	-	1581	1620	48	-	24	18	77	-	510	50	4493	-	17674	957	0.151	0.194	576.919
ID21-17_spot9	1354	-	1582	1623	43	-	26	14	75	-	500	30	4248	-	18772	447	0.15	0.181	590.494
ID21-17_spot13	1350	-	1581	1624	51	-	24	15	41	-	420	28	2754	-	14299	447	0.098	0.157	600.455
ID21-17_spot8	1354	-	1581	1620	45	-	22	11	45	-	470	15	2667	-	14931	175	0.096	0.15	607.313
ID21-17_spot11	1355	-	1581	1622	38	-	21	14	36	-	315	20	1802	-	9720	298	0.114	0.152	610.651
ID21-17_spot2	1355	-	1582	1622	43	-	24	12	47	-	480	30	2764	-	15758	383	0.098	0.146	612.192
ID21-17_spot10	1354	-	1581	1624	46	-	24	14	55	-	590	20	3332	-	20806	298	0.093	0.136	621.334
ID21-17_spot15	1357	-	1583	1623	49	-	24	12	63	-	800	35	4066	-	27237	447	0.079	0.128	625.572
ID21-17_spot6	1356	-	1581	1620	45	-	23	15	50	-	610	20	2849	-	20259	319	0.082	0.122	632.898
ID21-17_spot12	1350	-	1581	1620	48	-	24	10	47	-	710	15	2971	-	23308	160	0.066	0.112	638.624
ID21-17_spot1	1355	-	1581	1626	40	-	24	30	60	-	970	20	3283	-	31844	638	0.062	0.092	658.722
ID21-17_spot16	1357	-	1582	1623	45	-	23	12	44	-	860	10	2608	-	28060	128	0.051	0.085	662.761
																mean:	0.132062	0.180438	585.348
																1σ (internal):	0.0701939	0.0791999	64.0158
																1 SE (internal):	0.0175485	0.0198	16.0039
																		prop. 2 SE (internal and external):	40.6141
																		n:	16
ID21-18_spot3	1347	-	1581	1622	41	-	20	12	135	-	330	45	7010	-	10032	574	0.409	0.398	430.393
ID21-18_spot12	1350	-	1580.5	1624	39	-	19	13	185	-	630	45	9137	-	17588	622	0.294	0.334	468.297
ID21-18_spot13	1350	-	1582	1621	44	-	21	15	225	-	730	65	11533	-	22525	1037	0.308	0.329	477.445
ID21-18_spot9	1350	-	1581	1622	43	-	19	11	135	-	620	25	7351	-	17010	292	0.218	0.298	485.458
ID21-18_spot1	1348	-	1581	1624	48	-	20	9	105	-	565	15	6383	-	16030	144	0.186	0.283	492.237
ID21-18_spot8	1350	-	1580.5	1623	44	-	20	11	88	-	410	40	5100	-	12049	468	0.215	0.289	494.203
ID21-18_spot4	1352	-	1581.5	1624	42	-	20	12	95	-	540	15	5053	-	15869	191	0.176	0.239	536.268
ID21-18_spot2	1351	-	1581	1622	45	-	22	20	80	-	415	15	4559	-	13878	319	0.193	0.243	536.949
ID21-18_spot16	1353	-	1581.5	1622	48	-	19	18	55	-	360	12	3075	-	10050	230	0.153	0.23	539.1
ID21-18_spot7	1352	-	1581	1623	40	-	20	11	105	-	630	35	5532	-	18194	409	0.167	0.229	544.298
ID21-18_spot5	1350	-	1580	1622	42	-	20	12	90	-	540	40	4787	-	16417	510	0.167	0.22	553.901
ID21-18_spot14	1353	-	1580.5	1623	46	-	22	15	60	-	390	21	3215	-	13042	335	0.154	0.194	577.808
ID21-18_spot6	1351	-	1581	1623	43	-	20	12	95	-	810	20	5173	-	24625	255	0.117	0.172	590.217
ID21-18_spot15	1353	-	1581.5	1621	46	-	19	15	53	-	550	10	2840	-	15355	160	0.096	0.155	601.978
ID21-18_spot17	1354	-	1581	1624	40	-	20	8	40	-	340	15	1864	-	9991	128	0.118	0.156	607.591
																mean:	0.198067	0.251267	529.076
																1σ (internal):	0.0801777	0.067864	51.1396
																1 SE (internal):	0.0207018	0.0175224	13.2042
																		prop. 2 SE (internal and external):	36.9333
																		n:	15
ID21-19_spot15	1348	-	1582.5	1620	50	-	26	20	235	-	510	41	14284	-	19483	872	0.461	0.412	428.494
ID21-19_spot5	1352	-	1582	1620	50	-	23	20	255	-	770	70	14853	-	26022	1489	0.331	0.351	460.166
ID21-19_spot10	1350	-	1581.52	1622	43	-	24	17	295	-	710	70	15421	-	25037	1266	0.415	0.37	461.796
ID21-19_spot7	1351	-	1582	1624	43	-	24	11	185	-	550	55	9671	-	19395	643	0.336	0.326	488.177
ID21-19_spot17	1352	-	1582	1619	44	-	24	20	195	-	650	60	10430	-	21734	1276	0.3	0.312	493.409
ID21-19_spot6	1345	-	1581.5	1620	46	-	23	18	165	-	600	40	8842	-	20277	766	0.275	0.296	503.617
ID21-19_spot11	1351	-	1582	1622	46	-	26	17	145	-	490	44	8109	-	18719	795	0.296	0.294	511.523
ID21-19_spot3	1350	-	1582	1622	41	-	23	15	145	-	480	48	6926	-	16221	766	0.302	0.29	517.427
ID21-19_spot16	1352	-	1581	1620	44	-	24	12	110	-	470	15	5884	-	16574	191	0.234	0.26	530.555
ID21-19_spot4	1354	-	1582	1622	39	-	21	15	188	-	920	30	8541	-	28387	479	0.204	0.228	556.132
ID21-19_spot2	1350	-	1581	1623	37	-	22	11	110	-	500	65	4741	-	16163	760	0.22	0.219	570.322
ID21-19_spot9	1352	-	1581.52	1622	43	-	22	22	107	-	720	18	5593	-	23274	421	0.149	0.19	580.594
																mean:	0.293583	0.295667	508.518
																1σ (internal):	0.0838287	0.062073	44.2028
																1 SE (internal):	0.0241992	0.0179189	12.7603
																		prop. 2 SE (internal and external):	38.5309
																		n:	12
SR2E_spot17	1352	-	1583	1618	61	-	23	21	89	-	560	50	8528	-	18925	1117	0.159	0.311	454.447
SR2E_spot12	1353	-	1581	1617	52	-	24	19	140	-	710	30	11435	-	25037	606	0.197	0.314	462.35
SR2E_spot11	1351	-	1581	1614	58	-	21	22	90	-	670	50	8200	-	20673	1170	0.134	0.284	475.825
SR2E_spot7	1357	-	1581	1622	47	-	26	17	130	-	530	20	9598	-	20946	362	0.245	0.314	476.042
SR2E_spot1	1361	-	1580	1619	53	-	22	18	108	-	765	20	8991	-	24729	383	0.141	0.267	496.055
SR2E_spot18	1355	-	1583	1619	42	-	23	15	148	-	800	40	9764	-	26569	638	0.185	0.269	506.884
SR2E_spot15	1355	-	1582	1619	43	-	25	17	165	-	870	50	11145	-	30855	904	0.19	0.265	512.605
SR2E_spot10	1358	-	1580	1617	47	-	22	18	69	-	520	15	5094	-	16229	287	0.133	0.239	523.54
SR2E_spot8	1363	-	1582	1624	50	-	21	22	50	-	400	30	3927	-	13195	702	0.125	0.229	531.81
SR2E_spot14	1359	-	1581	-	43	-	25	-	75	-	460	-	5066	-	16606	-	0.163	0.234	537.786
SR2E_spot2	1356	-	1580	1618	50	-	22	19	92	-	820	35	7226	-	27422	707	0.112	0.209	549.226
SR2E_spot6	1359	-	1581	1616	45	-	24	17	101	-	720	45	7139	-	26267	814	0.14	0.214	552.307
SR2E_spot16	1356	-	1583	1620	48	-	25	14	90	-	720	50	6786	-	26448	744	0.125	0.204	558.485
SR2E_spot4	1356	-	1580.5	1619	48	-	22	18	80	-	770	35	6032	-	24461	670	0.104	0.198	558.535
SR2E_spot3	1357	-	1580.5	1619	38	-	20	15	112	-	980	10	6685	-	28799	160	0.114	0.188	572.239
SR2E_spot5	1357	-	1582	1617	39	-	24	17	84	-	580	30	5146	-	21865	542	0.145	0.191	578.338
																mean:	0.15075	0.245625	521.655
																1σ (internal):	0.0363636	0.0429955	38.5075
																1 SE (internal):	0.0090909	0.0107489	9.62688
																		prop. 2 SE (internal and external):	31.5548
																		n:	16
SR17A_spot6	1348	-	1582	1620	42	-	28	22	580	-	690	120	35793	-	27407	2808	0.841	0.542	371.829
SR17A_spot5	1349	-	1582	1620	46	-	31	22	1100	-	1240	250	69214	-	54531	5849	0.887	0.534	388.717
SR17A_spot7	1351	-	1582	1620	43	-	27	24	340	-	570	90	22223	-	22613	2297	0.596	0.471	397.355
SR17A_spot2	1351	-	1582	1620	44	-	26	21	650	-	1120	140	39121	-	42787	3127	0.58	0.46	405.475
SR17A_spot11	1351	-	1582	1619	42	-	28	22	520	-	805	130	29874	-	30832	3042	0.646	0.469	410.527
SR17A_spot10	1352	-	1582	1620	40	-	29	24	600	-	780	110	34046	-	33236	2808	0.769	0.486	417.824
SR17A_spot12	1351	-	1582	1621	40	-	25	24	500	-	870	90	28372	-	33061	2297	0.575	0.445	420.342
SR17A_spot13	1352	-	1581	1620	39	-	25	19	650	-	1230	150	35961	-	45182	3031	0.528	0.427	428.646
SR17A_spot16	1354	-	1583	1621	40	-	28	21	700	-	1150	140	39011	-	45679	3127	0.609	0.444	429.073
SR17A_spot14	1351	-	1582	1621	42	-	27	21	440	-	890	110	26216	-	34089	2457	0.494	0.418	430.14
SR17A_spot9	1350	-	1581	1620	40	-	27	24	475	-	810	90	25989	-	31025	2297	0.586	0.438	430.311
SR17A_spot4	1351	-	1582	1621	40	-	26	19	730	-	1355	170	39942	-	51765	3435	0.539	0.42	438.698
SR17A_spot1	1352	-	1581	1621	41	-	27	18	655	-	1450	120	38096	-	57524	2297	0.452	0.389	450.809
SR17A_spot18	1353	-	1581	1620	40	-	25	18	510	-	1350	120	28939	-	47878	2297	0.378	0.366	456.556
SR17A_spot3	1352	-	1581	1619	38	-	26	19	380	-	880	140	19752	-	32458	2829	0.432	0.359	477.827
																mean:	0.594133	0.444533	423.609
																1σ (internal):	0.139399	0.0509809	26.1628
																1 SE (internal):	0.0359927	0.0131632	6.75521
																		prop. 2 SE (internal and external):	29.141
																		n:	15
SR18B_spot3	1353	-	1583	1622	44	-	28	18	640	-	1000	180	44234	-	42562	3446	0.64	0.51	365.477
SR18B_spot14	1354	-	1584	1622	39	-	27	16	1200	-	1700	330	73513	-	67442	5615	0.706	0.522	366.689
SR18B_spot4	1353	-	1583	1621	45	-	28	17	1030	-	1650	350	72806	-	72571	6328	0.624	0.501	371.576
SR18B_spot6	1353	-	1583	1621	43	-	28	17	730	-	1150	180	49307	-	48946	3254	0.635	0.502	372.922
SR18B_spot13	1354	-	1584	1620	40	-	28	18	730	-	1170	200	45867	-	48135	3829	0.624	0.488	385.447
SR18B_spot7	1353	-	1584	1622	41	-	27	18	440	-	760	110	28337	-	31192	2106	0.579	0.476	388.176
SR18B_spot16	1354	-	1584	1623	37	-	26	18	1200	-	1790	240	69743	-	73105	4594	0.67	0.488	395.409
SR18B_spot1	1355	-	1584	1623	38	-	28	15	1410	-	2290	415	81445	-	90961	6620	0.616	0.472	400.752
SR18B_spot2	1354	-	1584	1623	38	-	27	18	1140	-	2200	300	68047	-	87278	5743	0.518	0.438	414.543
SR18B_spot5	1353	-	1583.5	1622	39	-	26	17	605	-	1240	130	37063	-	49007	2350	0.488	0.431	414.819
SR18B_spot15	1352.5	-	1583	1621	35	-	29	17	1350	-	1830	290	74220	-	79324	5243	0.738	0.483	414.844
SR18B_spot9	1354	-	1584	1622	36	-	26	15	750	-	1330	200	42412	-	52564	3190	0.564	0.447	415.688
SR18B_spot8	1353.5	-	1584	1621	37	-	29	18	540	-	940	110	31385	-	41437	2106	0.574	0.431	435.051
SR18B_spot10	1353	-	1584	1622	35	-	29	18	810	-	1430	110	44532	-	63037	2106	0.566	0.414	451.359
SR18B_spot11	1353	-	1584	1623	38	-	30	20	520	-	1100	80	31039	-	48488	1702	0.473	0.39	454.915
SR18B_spot12	1354	-	1584	1623	38	-	28	18	720	-	1900	140	42977	-	78168	2680	0.379	0.355	468.553
																mean:	0.587125	0.45925	407.264
																1σ (internal):	0.0882354	0.0451754	31.4749
																1 SE (internal):	0.0220588	0.0112938	7.86873
																		prop. 2 SE (internal and external):	29.5409
																		n:	16
SR19_spot11	1349	-	1580	1619	40	-	21	20	163	-	690	70	8918	-	20923	1489	0.236	0.285	504.446
SR19_spot17	1349	-	1580	1619	41	-	22	18	120	-	660	50	5981	-	20598	957	0.222	0.271	515.409
SR19_spot3	1353	-	1580	1622	41	-	20	12	95	-	500	32	5328	-	14693	408	0.19	0.261	516.873
SR19_spot8	1350	-	1580	1621	38	-	19	16	174	-	870	90	9044	-	24288	1531	0.2	0.259	521.901
SR19_spot10	1351	-	1579.5	1622	50	-	22	20	65	-	520	28	4610	-	16809	596	0.125	0.209	553.15
SR19_spot12	1351	-	1580	1620	40	-	21	20	112	-	750	40	6128	-	23142	851	0.149	0.203	566.723
SR19_spot9	1350	-	1580	1619	48	-	21	20	47	-	455	15	3200	-	14039	319	0.103	0.182	575.303
SR19_spot7	1352	-	1579	1622	42	-	21	13	80	-	710	15	4766	-	21151	207	0.113	0.182	578.338
SR19_spot2	1354	-	1580	1621	41	-	21	14	68	-	580	22	3955	-	17896	328	0.117	0.178	583.815
SR19_spot15	1352	-	1580	1620	46	-	21	16	37	-	460	20	2501	-	13949	340	0.08	0.149	603.473
SR19_spot14	1349	-	1580	1622	42	-	19	20	92	-	1240	10	6070	-	35215	213	0.074	0.147	603.756
SR19_spot18	1354	-	1580	1620	45	-	22	16	54	-	595	25	3201	-	19234	425	0.091	0.14	616.454
SR19_spot1	1354	-	1581	1619	40	-	21	19	90	-	1310	50	5107	-	39026	1010	0.069	0.116	635.286
SR19_spot16	1352	-	1579.5	1619	45	-	21	18	20	-	540	12	1414	-	16087	230	0.037	0.08	663.703
																mean:	0.129	0.190143	574.188
																1σ (internal):	0.0593332	0.0596392	46.4539
																1 SE (internal):	0.0158575	0.0159393	12.4153
																		prop. 2 SE (internal and external):	36.4808
																		n:	14
SR24_spot10	1340	-	1580	1618	50	-	19	19	200	-	1350	120	13932	-	38990	2425	0.148	0.252	514.143
SR24_spot9	1343	-	1580	1620	47	-	20	17	182	-	1080	130	12135	-	33929	2350	0.169	0.251	521.412
SR24_spot13	1343	-	1579.5	1618	48	-	19	20	210	-	1390	140	13788	-	40145	2978	0.151	0.242	525.703
SR24_spot18	1342	-	1581	1619	49	-	20	22	130	-	820	90	8713	-	24929	2106	0.159	0.244	525.936
SR24_spot5	1349	-	1580	1618	48	-	20	19	146	-	900	100	9230	-	27361	2021	0.162	0.239	532.157
SR24_spot6	1348	-	1580	1619	48	-	20	20	140	-	900	105	9192	-	27361	2233	0.156	0.237	532.519
SR24_spot17	1343	-	1580	1617	47	-	19	22	170	-	1250	118	10929	-	36102	2761	0.136	0.22	544.711
SR24_spot1	1350	-	1580.5	1620	45	-	20	18	140	-	990	130	8937	-	30097	2489	0.141	0.215	551.539
SR24_spot16	1340	-	1580	1616	50	-	19	21	82	-	750	100	5712	-	20938	2233	0.109	0.198	560.054
SR24_spot8	1345	-	1580	1619	44	-	19.5	18	190	-	1550	160	11435	-	44411	3063	0.123	0.194	568.553
SR24_spot7	1351	-	1580	1618	42	-	19	18	148	-	1040	140	7872	-	30036	2680	0.142	0.194	574.244
SR24_spot2	1351	-	1580	1618	40	-	19	19	190	-	1450	120	8854	-	41179	2425	0.131	0.169	597.631
																mean:	0.143917	0.22125	545.717
																1σ (internal):	0.0165703	0.026042	24.1667
																1 SE (internal):	0.00478345	0.00751769	6.97631
																		prop. 2 SE (internal and external):	32.0626
																		n:	12
